# Supplementary material for: Bayesian Estimation of real-time Epidemic Growth Rates using Gaussian Processes: local dynamics of SARS-CoV-2 in England
Source: bioRxiv or medRxiv preprint supplement (doi:10.1101/2022.01.01.21268131), 2022-01-26
Supplement: Supplementary file [file media-1.pdf]

2

# 3 **Web-based supporting materials for "Bayesian** 4 **Estimation of real-time Epidemic Growth Rates using** 5 **Gaussian Processes: local dynamics of SARS-CoV-2** 6 **in England"**

7 **by Laura M Guzmán-Rincón<sup>1,2</sup> | Edward M Hill<sup>1,2</sup> | Louise Dyson<sup>1,2</sup> |**  
8 **Michael J Tildesley<sup>1,2</sup> | Matt J Keeling<sup>1,2</sup>**

<sup>1</sup>The Zeeman Institute for Systems Biology & Infectious Disease Epidemiology Research, School of Life Sciences and Mathematics Institute, University of Warwick, Coventry, CV4 7AL, United Kingdom

<sup>2</sup>Joint UNiversities Pandemic and Epidemiological Research, <https://maths.org/juniper/>

8 **S | SUPPLEMENTARY MATERIAL**

9 **S.1 | Directed acyclic graph of the models**

10 We display directed acyclic graph corresponding to the positives model described in Section 2.1.1 (Figure 1) and the proportions  
11 model described in Section 2.1.2 of the main document (Figure 2), respectively.

12 **S.2 | Growth rate comparison**

13 Let  $w$ ,  $n$  and  $z$  be continuous functions on  $\mathbb{R} \cup \{0\}$ , such that at a given time  $t \in \{0, 1, \dots\}$ ,  $w(t)$  denotes the number of  
14 new cases,  $n(t)$  denotes the number of tests, and  $z(t)$  denotes the number of positive tests. Note that although  $w$ ,  $n$  and  
15  $z$  are continuous functions, their values have an interpretable meaning only on discrete times (for instance, daily counts).  
16 Our goal is to estimate the growth rate  $r(t)$ , defined as the *per capita* change in the number of new cases per time; that is,  
17  $r(t) = \partial_t(w(t))/w(t)$ .

18 In the positives model, we approximate  $r(t)$  as the growth rate of observed positive tests  $z(t)$ , denoted  $r_z(t) =$   
19  $\partial_t(z(t))/z(t)$ . We describe  $z(t)$  in terms of a latent function  $x(t)$  such that  $z(t) = \exp(x(t))$ , which simplifies the  
20 growth rate as  $r(t) \approx r_z(t) = \partial_t(x(t))$ .

21 In the proportions model, we describe the proportion of positive tests  $z(t)/n(t)$  in terms of a latent function  $x(t)$  such that  
22  $z(t)/n(t) = \text{logit}^{-1}(x(t))$ . The derivative of  $x_t$  is not directly related to  $r_z(t)$  as in the positives model; however, we show  
23 below it is related to  $r_z(t)$  and  $r_n(t)$ , where  $r_n(t) = \partial_t(n(t))/n(t)$  is the growth rate of number of tests performed. First, we

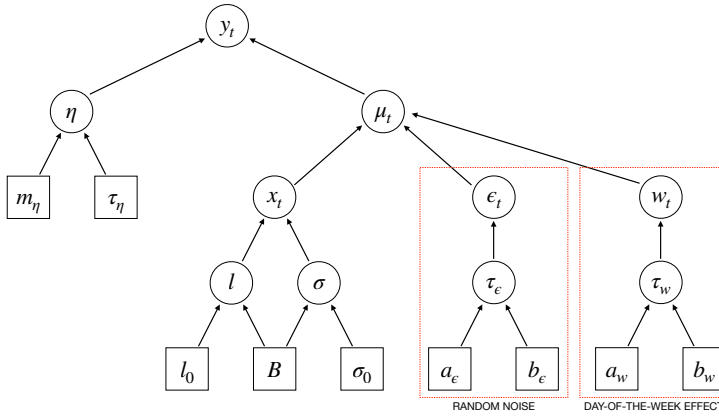

FIGURE 1 Directed Acyclic Graph describing the hierarchical conditional independence structure of the positives model, described in Section 2.1.1. The parameters  $\eta$ ,  $\mu_t$ ,  $x_t$  and  $\epsilon_t$  and the hyperparameters  $l$ ,  $\sigma$ ,  $\tau_\epsilon$  and  $\epsilon_w$  are enclosed in circles. Inputs of the model are enclosed in squares.

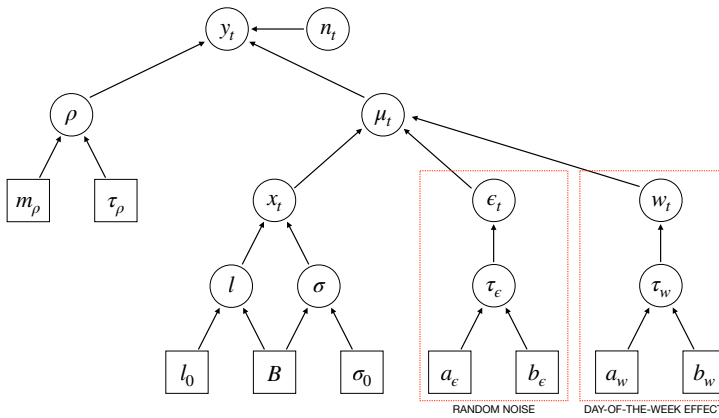

FIGURE 2 Directed Acyclic Graph describing the hierarchical conditional independence structure of the proportions model, described in Section 2.1.2. The parameters  $\rho$ ,  $\mu_t$ ,  $x_t$ ,  $\epsilon_t$  and  $w_t$  and the hyperparameters  $l$ ,  $\sigma$ ,  $\tau_\epsilon$ ,  $\epsilon_t$  and  $w_t$  are enclosed in circles. Inputs of the model are enclosed in squares.

24 compute the derivative of the function  $x(t)$ :

$$\begin{aligned}
 25 \quad \partial_t(x(t)) &= \partial_t \left[ \log \left\{ \frac{z(t)}{n(t) - z(t)} \right\} \right] \\
 26 \quad &= \left( \frac{n(t) - z(t)}{z(t)} \right) \left( \frac{n(t) \partial_t(z(t)) - z(t) \partial_t(n(t))}{(n(t) - z(t))^2} \right) \\
 27 \quad &= \{r_z(t) - r_n(t)\} [1 + \exp\{x(t)\}]. \\
 28
 \end{aligned}$$

29 Then, we approximate  $r(t)$  as the growth rate of positive tests minus the growth rate of number of tests:  $r(t) \approx r_z(t) - r_n(t) =$   
 30  $\partial_t(x_t) / [1 + \exp\{x(t)\}]$ .
